# Supplementary material for: NitroNet – A deep-learning NO 2 profile retrieval prototype for the TROPOMI satellite instrument
Source: Copernicus journal article supplement (doi:10.5194/egusphere-2024-1196), 2024-05-21
Supplement: Supplementary file [file egusphere-2024-1196-AC1-supplement.pdf]

## Authors' reply to RC1 by Anonymous Referee 1

We would like to thank Anonymous Referee 1 for the constructive and encouraging review of our manuscript. Please find our point-by-point replies below. The Referee's comments are printed in blue, and our replies in black.

### General comments:

1. Line 102: Using only one month as training data cannot enable the model to learn seasonal variability, and the authors also acknowledge this limitation in lines 389-390. It is suggested to clarify the reason for choosing only one month in the input data preparation sections, which would be useful for the readers.

We acknowledge, that this point should have been made more clear.

Ideally, we would like to train on a full year of data. However, the process of generating the training data is not straight forward. Models like WRF-Chem often show severe disagreement to reference data (e.g. NO<sub>2</sub> VCDs from TROPOMI or the AirBase in situ measurements). This was also the case for our training data of May 2019. However, we were able to fine-tune some of the model's parameters, which has lead to a significant reduction of the discrepancies between the model and observational data. This process took approximately one year, and is documented in detail in our previous publication, see Kuhn et al. (2024). Unfortunately, simulation setups that work well for summertime do not necessarily work well for wintertime. In test runs of our simulation for winter months, we found large model biases in the form of NO<sub>2</sub> VCD overestimations by + 50 %. This is similar to the findings of Douros et al. (2023) and others.

Altogether, our WRF-Chem simulation setup can currently not provide what the Referee asks for. This might be resolved in the future, but is not within the scope of our article and should be expected to take a long time.

The following paragraph was added to sect. 2.1: *This study revolved around the question, how certain WRF-Chem model parameters can be optimized in order to improve the model's agreement to various reference datasets. In particular, optimization of the model's vertical mixing parametrization was found to be crucial to improve the agreement to in situ observations of surface NO<sub>2</sub>. Unfortunately, such optimization processes take a long time to solve if the underlying model is as computationally expensive as WRF-Chem. Additionally, wintertime RCT simulations are known to be particularly challenging (see e.g. Douros et al. (2023)), mainly due to their tendency to overestimate the total NO<sub>2</sub> columns severely. Therefore, full-year training data with a resolution and accuracy compared to our summertime data cannot be provided for now. Although NitroNet was trained exclusively on summertime data, it can be used in other seasons as well, although with larger prediction errors (as discussed in sect. 4.3).*

2. Section 2.1: As the NO<sub>2</sub> is mainly present at the near surface and much less in the upper layers of the atmosphere, the large difference in the magnitude of the NO<sub>2</sub> between the layers can lead to a skewed distribution of the targets in the training data set. In this work, a feature transformation was applied to the input variables, but it is not clear whether the transformation was also applied to the target variable. If not, would this affect the predictive ability of the model in the higher layers? It would be beneficial to clarify this. It is also suggested to clarify the data splitting strategy (e.g. sample-based, space-based, or period-based).

The Referee's observation is correct. The original target distribution is skewed. Therefore, a logarithmic transformation was applied to the targets, resulting in a less skewed distribution (see Figure C1 below). This is expected to improve the model's performance overall, independent of the altitude.

Figure C1 was added to the Appendix of the manuscript.

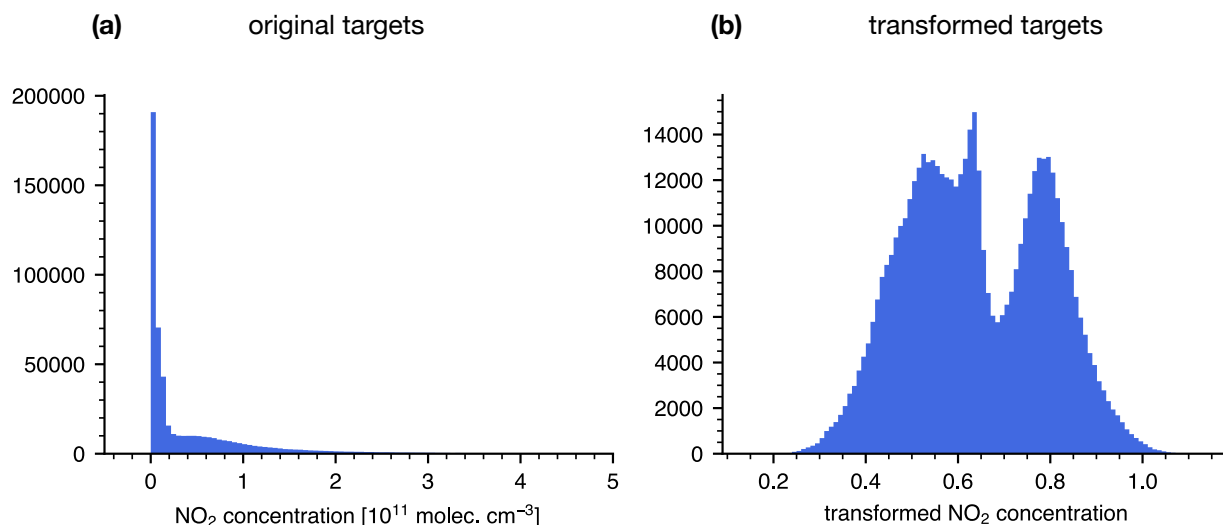

**Figure C1.** Example of the data transformations used during the training of NitroNet. Shown here: histograms of the training targets (NO<sub>2</sub> concentrations) at all altitudes before (a) and after (b) application of a logarithmic data transformation. The transformed targets are unitless.

The following paragraph was added to sect. 3.2: *Feature transformations are known to improve the predictive capability of machine learning models, particularly if the features or targets have a skewed or long-tailed distribution. This is the case for some of NitroNet's input features (e.g. the NO<sub>2</sub> VCD). Likewise, transformations are applied to NitroNet's training targets (the NO<sub>2</sub> concentrations at different altitudes), see e.g. Fig. C1.*

A sample-based splitting strategy was used. This means, that the training, validation, and test data are obtained by drawing a corresponding number of samples from the full dataset without replacement.

The following sentence was added to sect 2.1: *The partitioning is obtained by unweighted random sampling without replacement.*

3. It is suggested that section 3.1 be merged with section 2.2 as both sections describe the model input.

We prefer to keep the structure of section 3.1 and section 2.2 as is, for the following reason:

Section 2 describes the properties of the datasets used in our article. These are independent of our model design, choices in training procedure, and methodology.

Section 3.1, on the other hand, is highly specific to our design choices. Examples are the classification of SNAP sectors, the choice of ERA5 model levels, the ternary surface classification, etc.

We find that this is an important difference that justifies separate sections, particularly if they follow one another directly.

The following sentence was added to sect. 3.1: *In contrast to sect. 2, the descriptions given here are based on our design choices, e.g. how the used data were selected and processed.*

4. Section 3.3: It is necessary to explain more about the filtering strategy. The filtering takes the TROPOMI data and the ERA5 PBLH data as reference data, but their uncertainty should also be acknowledged here. Meanwhile, it would be beneficial to show the spatial distribution of the filtered

training samples to check if there are still enough samples left for different grids within the study area. For example, the number or proportion of training samples left for a grid.

The text was changed to acknowledge the uncertainty of the reference data. The following paragraph was added to sect. 3.3: *Figure C2 gives an overview of the spatial distribution of NO<sub>2</sub> VCDs after filtering, and the fraction of remaining instances across the domain.*

*It should be mentioned, that the TROPOMI NO<sub>2</sub> VCD and the ERA5 PBLH are quantities with significant uncertainties. For the retrieval of the tropospheric NO<sub>2</sub> VCD, the tropospheric air mass factor uncertainty (typically 20 % - 50 %) is known to dominate the overall uncertainty of the column (typically 30 % - 60 %), see e.g. Liu et al. (2021). Guo et al. (2024) report summertime ERA5 PBLH errors of approximately 150 m over continental regions, derived from radiosonde measurements. With an average PBLH of approx. 1500 m on the WRF-2019 domain, this amounts to a relative uncertainty of approx. 10 %.*

A plot of the monthly-mean NO<sub>2</sub> VCDs in the filtered training data set can be found in panel (a) of Figure C2 below.

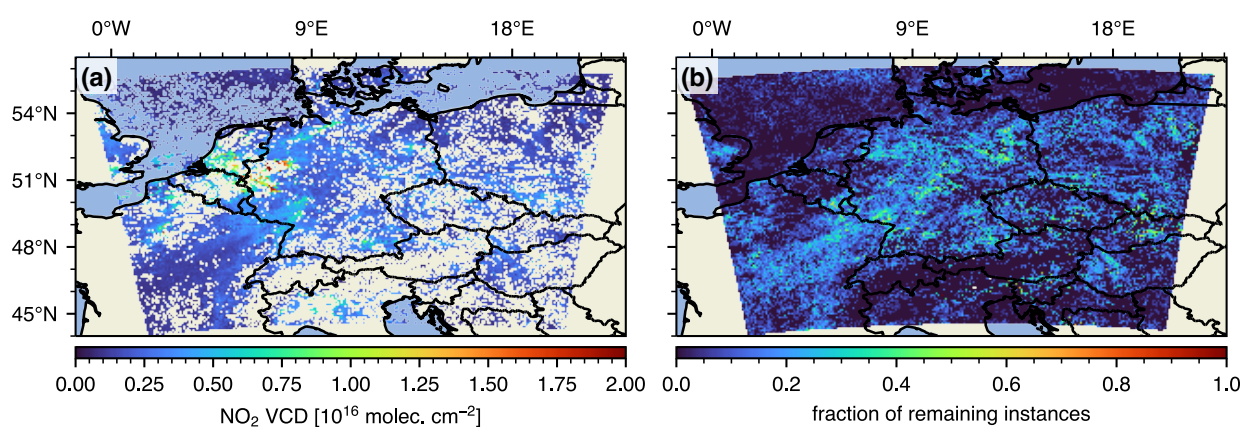

**Figure C2.** Overview of the TROPOMI NO<sub>2</sub> VCDs (with re-computed air mass factors) upon application of the data filter described in sect. 3.3. **(a)** shows the remaining data, averaged over all orbits of May 2019. **(b)** shows the remaining fraction of instances in relation to the un-filtered dataset.

Because the filter criteria are very strict, the filtering does result in gaps in the spatial distribution of the targets. Panel (b) shows the proportion of remaining training samples in each location. The Referee's comment suggests, that a reduced number of samples would have a negative impact on the neural network. This could be a valid concern, if the filtering removed entire retrieval scenarios (e.g. all water pixels), but this is not the case here. Figure C2 was added to the Appendix of the manuscript.

5. Lines 247, 252: It's questionable whether the validation is fair here, as the test dataset is also filtered. The validation and test data sets are very important for examining the generalization performance of the model and should represent the unseen scenario to which the NitroNet is applied. The validation data is used to optimize the model and the test data is used as a final check. Considering that the model is not only used within the training month (i.e., May 2019), the filtering based on WRF results is not available when the model is applied to a different area and period. The current test result is likely to give an overly optimistic assessment of the model generalization. Therefore, it is suggested to complement the comparison based on the unfiltered test dataset.

The Referee is correct. The test data shown in Fig. 3 and discussed in l. 245 - 255 is filtered. It is also correct, that when the filter is removed, there are larger errors in the neural network prediction. Nonetheless, the comparison against a filtered test set is both more informative, as well as methodically correct for the following reasons:

- 1) If the validation data were not filtered, the model's hyperparameter optimization would be influenced by the erroneous data of the WRF-Chem simulation.

- 2) If the test data were not filtered, it would mask a significant property of the neural network, namely its robustness towards (some) systematic errors of the WRF-Chem model. As demonstrated, using filtered training data can prevent the neural network from reproducing the severe overestimations of NO<sub>2</sub> in western Europe. If we use unfiltered test data, we would compare NitroNet predictions to erroneous WRF-Chem examples in many cases, meaning that deviations between the two would actually be favorable. This skews the interpretation of the study.
- 3) Using filtered test data allows to investigate the neural networks generalization capability in isolation. This way, we can assess how well the neural network reproduces unseen test data of exactly the same distribution as the training data in absence of any other effects. It tells us, what portion of the NitroNet errors revealed in the validation study later are due to the choice of neural network and its training procedure, e.g. the „model misspecification error“, and the „model optimization error“.

Using un-filtered test data would only serve one purpose: to (implicitly) assess the performance of NitroNet in „real“ use-cases when no data filtering can be applied. However, this is already investigated explicitly, in sect. 4.2.

A version of Fig. 3 showing the evaluation on un-filtered data is shown below in Fig. C3:

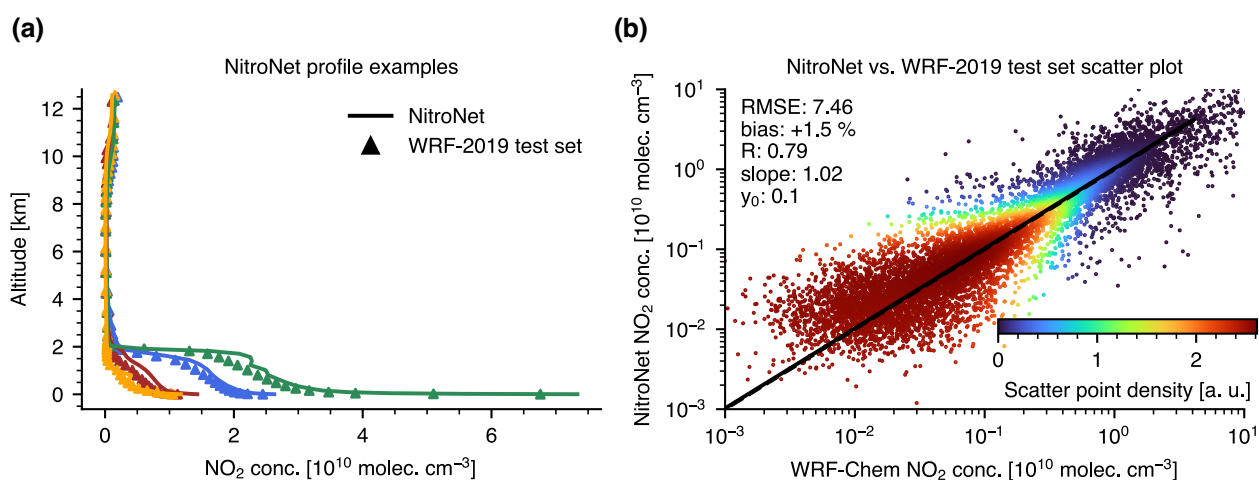

**Figure C3.** Like Fig. 3, but computed on the un-filtered test set.

Figure C3 was added to the Appendix of the manuscript. The following paragraph was added to sect. 4.1: *Note, that Fig. 3 shows data from the filtered test set exclusively. This choice was made for two main reasons: On one hand, we aim to exclude supposedly erroneous NO<sub>2</sub> profiles from WRF-Chem for the evaluation of NitroNet. These would result in larger errors in the comparison between WRF-Chem and NitroNet, particularly because the WRF-Chem NO<sub>2</sub> profiles show systematic errors that NitroNet does not reproduce. This is demonstrated more explicitly further below. On the other hand, the evaluation against filtered test data is an assessment of the neural network’s performance in isolation, i.e. it indicates its prediction errors on instances from the same distribution as the training set. For completeness, a version of Fig. 3 based on un-filtered test data is shown in Fig. C3.*

6. Lines 335-336: Omitting the urban station from the validation does not seem to be a good choice. The dynamic of NO<sub>2</sub> is closely related to human activity, while the measurements outside the urban stations mainly provide low and relatively stable NO<sub>2</sub>. Comparing the model results with these non-urban stations, it is difficult to evaluate the ability of NitroNet to capture the surface NO<sub>2</sub> dynamics.

We acknowledge, that this section of our article should have been explained more clearly.

On one hand, the slight low bias of NitroNet in comparison to urban stations is an important finding that we decided to show in our article. On the other hand, we have reasons to be skeptical towards the stations’ classification, as described in l. 327-336. In response to the Referee’s comment we have added another argument to the corresponding discussion.

The following paragraph was added to sect. 4.2.1: *Furthermore, Fig. 7 shows significant low biases in NitroNet's surface predictions, but no corresponding low biases in the tropospheric columns. This can partly be attributed to the inter-pixel variability of the TROPOMI measurements. Surface stations with a large NitroNet bias are possibly located closer to strong traffic emissions, and thus less correlated with the NO<sub>2</sub> VCD, which acts as the main model input.*

Besides that, we believe that the best way to convey these ambiguities to the reader is to always show both versions (with / without urban stations) of each figure. The following figures are affected (figure names refer to the revised manuscript version):

- Figure 7: already shows both versions
- Figure 11: a version with urban stations is already shown in Fig. C6
- Figure 13: a version with urban stations was added (Fig. C9)
- Figure C4: already shows urban stations. A version without urban stations was added (Fig. C5).

7. [Lines 425-450 and Figure 13](#): This part of the study examines the seasonal performance of the NitroNet on a daily and monthly basis, with a particular focus on the monthly-mean results. Figure 13 illustrates that while both results exhibit comparable trends, the monthly-mean results are superior to the daily-mean results. Furthermore, the monthly-mean results are not simply the average of the daily-mean results. Considering that the NitroNet provides hourly outputs and the TROPOMI overpasses once a day, it is more realistic to report the daily means in practice. The use of monthly means may result in overly optimistic assessments, and authors also recognize that the use of monthly means can reduce statistical noise, as stated in line 449. It can be understood that the significant data gap interferes with the daily-mean results as stated in lines 446-449. Consequently, it is recommended that the authors aggregate all the daily means and then calculate the overall RMSE, bias, and Pearson correlation as a monthly evaluation.

If the metrics are computed on monthly-mean data, they are indeed overly optimistic, because the averaging reduces the noisiness of the NitroNet predictions. We would still like to show the monthly-mean comparison in order to maintain inter-comparability to other model studies, some of which have shown monthly-mean results in the past. This requires we leave the evaluation as is. Please note, that the monthly means of the diagnostics computed on daily data can be directly obtained from Fig. 13 as shown. This is not the case for the diagnostics computed on monthly means. The explanations were made more clear in order to avoid ambiguities.

The following paragraph was added to sect. 4.3: *The NitroNet predictions were evaluated against TROPOMI and AirBase observations, and time series of the bias, RMSE, and correlation coefficient were computed, see Fig. 13. Shown here are daily mean values, as well as monthly mean values in analogy to the other evaluations presented up to this point. Note, that in this context "monthly-mean bias" refers to the bias computed on monthly means, as opposed to the monthly mean of daily biases (which can be estimated from the daily values shown in Fig. 13). The same holds for the RMSE and the correlation coefficient. Because averaging over multiple days reduces the noisiness of the NitroNet predictions, the monthly-mean RMSE values are smaller, and the correlation coefficients larger, than on unaveraged data. The mean biases, however, are unaffected by averaging.*

8. [Section 2, conclusions, discussion, and outlook](#): Have the authors considered using surface NO<sub>2</sub> from in-situ measurements as another target for model training? It is not necessary to emphasize the uniqueness of NitroNet over previous models by training it only on NO<sub>2</sub>. There are hundreds (even thousands) of stations measuring surface NO<sub>2</sub> which is the dominant fraction of total NO<sub>2</sub>. Thus, using measured surface NO<sub>2</sub> as an additional target could enrich the constraints for model training and improve model agreement with surface measurements. Although the authors point out the uncertainty inherent in the in-situ measurements several times, the uncertainty in the synthetic data and the remote sensing data cannot be ignored either. Therefore, it is better not to underestimate "training on ground measurements". The prospects of incorporating ground data into NitroNet training should be discussed.

Training neural networks on targets from surface NO<sub>2</sub> measurements has become a popular topic with many published articles over the past years. With the methodological framework laid out, the newer studies mainly vary by type of neural network, geographic region, and the input variables. However, using empirical



training targets is linked to irresolvable limitations (e.g. the lack of profile data, and the presence of NO<sub>z</sub> biases in the training data). To explore how these can be overcome by synthetic training data is among the main topics of our article. Therefore, training NitroNet on NO<sub>2</sub> surface measurements as targets is not in its scope.

In the future, we might explore methods to use the agreement between model-borne training data and surface in situ measurements as an additional data filter criterion. This would (implicitly) embed some of their information into NitroNet. However, this is currently infeasible, because it reduces the total number of remaining profiles far too much (mostly due to the sparsity of the measurements). This might change, e.g. by extension of the spatio-temporal model domain, or by using machine learning methods particularly designed for sparse training data.

The following paragraph was added to sect. 5: *The ongoing efforts in harmonizing observational datasets (see e.g. the GHOST dataset, see Bowdalo et al. (2024)) will allow for easier model validation at the surface in all regions of the Earth. In particular, they might open up new possibilities to include the valuable information from surface in situ measurements into NitroNet. Previous studies have reported on neural networks trained directly on in situ observations (see e.g. Gardner and Dorling (1999); Kang et al. (2021); Chan et al. (2021); Ghahremanloo et al. (2021); Zhang et al. (2022); Jesemann et al. (2022); Cao (2023)). NitroNet aims to overcome the aforementioned disadvantages associated with empirical training targets by using synthetic training data instead. Nonetheless, information from in situ measurements could be included implicitly by using it as an additional criterion in the data filtering procedure. This results in significantly smaller training sets, because the European in situ observations are sparse compared to the satellite measurements. Such limitations could be overcome by extension of the regional model's spatio-temporal domain, or neural network training methods specifically designed for sparse training data (e.g. by data augmentation).*

#### Minor comments:

1. Line 14: Here the authors mention three datasets, so the statistics from MAX-DOAS validation should also be mentioned. Changed as proposed.
2. Line 16 "summertime": Maybe the "late spring" would be more appropriate. Changed as proposed.
3. Lines 54-56: The typical uncertainty of MAX-DOAS is suggested to be mentioned.

The following sentence was added to sect. 1: *An intercomparison study of MAX-DOAS retrieval algorithms by Tirpitz et al. (2021) revealed relative retrieval uncertainties of between 3 % and 70 %, which can be expected to be the dominant part of the total MAX-DOAS uncertainty.*

4. Lines 85-92: The statement of the benefits of the NitroNet approach could be further refined. Here are two points the authors might refer to:
  1. Leveraging the synthetic data can overcome the limitations of insufficient measurements and enable the ML model to perform the prediction task for a larger space with more dimensions.

This was already expressed in l. 85-86 (original manuscript).

2. In addition to providing a substantial number of training samples, the synthetic dataset allows the model to learn a more general and physically plausible pattern of NO<sub>2</sub>, which could enhance the model's generalization performance.

It should not be claimed that the 3D distributions of NO<sub>2</sub> from a WRF-Chem simulation are generally more physically plausible than actual measurements. One might argue that this is the case, if the NO<sub>z</sub> biases are taken into consideration. This, however, was already expressed in l. 87-88 (original manuscript).

5. Lines 120-122: Although QA filtering is a common operation for TROPOMI data processing, it may result in significant missing data and limit the generalization of the ML model. As shown in Figure C4, such filtering may result in few samples over NO<sub>2</sub> hot spots for model training. Moreover, does it mean the NitroNet can only be used when TROPOMI QA is greater than 0.75? A related discussion is suggested.

NitroNet can be used with arbitrary qa-values, but a threshold of  $qa > 0.75$  is recommended. Please refer to Fig. C2 above, which shows only data with  $qa > 0.75$ .

6. Lines 124-125: ERA5 hourly reanalysis data resolution should be 0.25 rather than 0.125. The ERA5-land hourly has the resolution 0.1 but seems not used in this work. Meanwhile, the year of reference provided seems to be 2016 instead of 2017 (<http://www.ecmwf.int/en/newsletter/147/news/era5-reanalysis-production>).

Many thanks for the hint! This mistake on our behalf has been corrected, and the reference was changed to:

Hersbach H, Bell B, Berrisford P, et al. The ERA5 global reanalysis. Quarterly Journal of the Royal Meteorological Society, 146, 1999–2049, <https://doi.org/https://doi.org/10.1002/qj.3803>, 2020.

7. Lines 144 and 194: As this work mentions the Monte Carlo (MC) method is used to address the uncertainty, is the MC method the MC Dropout? Can the authors state how many times the predictions are called when using this method? Is the model output the average of multiple MC runs? As information on the prediction uncertainty for the ML model is essential for model reliability, I have not found the uncertainty reported by MC in this manuscript, can the authors complement it?

The MC method for uncertainty propagation referred to in our manuscript is not the same as the regularization method „MC dropout“. A clarifying explanation was added to the manuscript. The number of MC predictions can be chosen by the user (more predictions → better statistical assessment of the uncertainty). The model output is not the average of multiple MC runs. The MC routine is only used for the assessment of the input uncertainty propagation.

The input uncertainty from the MC routine was not reported for the following reason: In „bulk“ comparisons, such as shown in our manuscript, the model output is dominated by the usual machine learning uncertainties (e.g. the model's aleatoric and epistemic error). The input uncertainty can be a relevant error source in the prediction of individual profiles. Then, the relative input uncertainty is approximately equal to the relative uncertainty of the input NO<sub>2</sub> VCD, which is typically on the scale of 30 %, but can be estimated more accurately in individual predictions.

The following sentence was added to sect. 4.1: *Because the NO<sub>2</sub> VCD is the dominant input variable of NitroNet, and acts essentially as a scaling factor for the predicted NO<sub>2</sub> profiles, the relative prediction uncertainty is approximately equal to that of the NO<sub>2</sub> VCD (here: 30 % - 60 %).*

8. Lines 103, 148: How does the “43 terrain-following pressure levels” enable the NitroNet model to output “186 levels”?

The 43 terrain-following pressure levels of WRF-Chem correspond to slightly different altitudes above ground, depending on location and time. Therefore, „altitude“ is not a discrete, but continuous variable in the training set. NitroNet can return the NO<sub>2</sub> concentration at arbitrary altitudes within the troposphere, as explained in l. 143-149.

The following paragraph was added to sect. 3: *Although WRF-2019 is resolved on 43 vertical pressure levels, these correspond to different altitudes above ground across the spatio-temporal model domain. Therefore, NitroNet can be trained to predict the NO<sub>2</sub> concentration at arbitrary tropospheric altitudes.*

9. Line 187: Can the authors state the total number of parameters or trainable parameters in NitroNet?

A neural network with 8 layers of 326 neurons each has approximately  $8 \times 326^2 + 8 \times 326 \approx 850000$  trainable parameters. The first term is due to the network's connection weights, and the second corresponds to the neuron biases. The exact number can vary slightly, because some model components have trainable parameters (e.g. the PReLU activation adds another 8).

The following sentence was added to sect. 3.2: *The neural network has 8 hidden layers with 326 neurons each, corresponding to approximately 850000 trainable parameters.*

10. Section 3.4: Will the out-of-distribution treatment be applied to the model application process or just to the training process? The marginal probability density distributions  $p_{xi}(x)$  are calculated on the filtered training set which has only 7% data remaining. If the OOD treatment is also applied to the application process, will many instances be treated as OOD?

Yes, the OOD treatment is applied at prediction time. How many instances are recognized as OOD depends on the OOD threshold (here: 0.15) and the input data, whose values may vary depending on season and location.

The following sentence was added to sect. 3.4: *The described method is applied exclusively at prediction time. The amount of features affected depends mainly on the season and location of the input data.*

11. Lines 238-240: As the NitroNet only has one output neuron for the NO<sub>2</sub> concentration, how can an additional output for the ratio *F* be generated?

The prediction of *F* is achieved by training the neural network on the NO<sub>2</sub> targets, and then subsequently training a copy of it on *F* targets. The two neural networks are then merged into a single model object. In NitroNet's code interface, the user can pass a parameter `predict_F_values` whose value (True / False) decides whether the model internally uses the NO<sub>2</sub> target network, or the *F* target network.

The following sentence was added to sect. 3.5: *Internally, this additional output is achieved by instantiating a second identical neural network, trained on the *F* targets from WRF-2019 instead of the NO<sub>2</sub> targets.*

12. Lines 318-320: It is suggested to add a validation experiment for 2019 only on the still valid stations in 2022. Considering the significantly reduced number of valid stations in Italy, the difference in the statistics shown in the manuscript makes less sense.

Figure D1 below shows a version of Fig. 5, e.g. a validation against AirBase measurements of the year 2019, where only stations still valid in 2022 are shown.

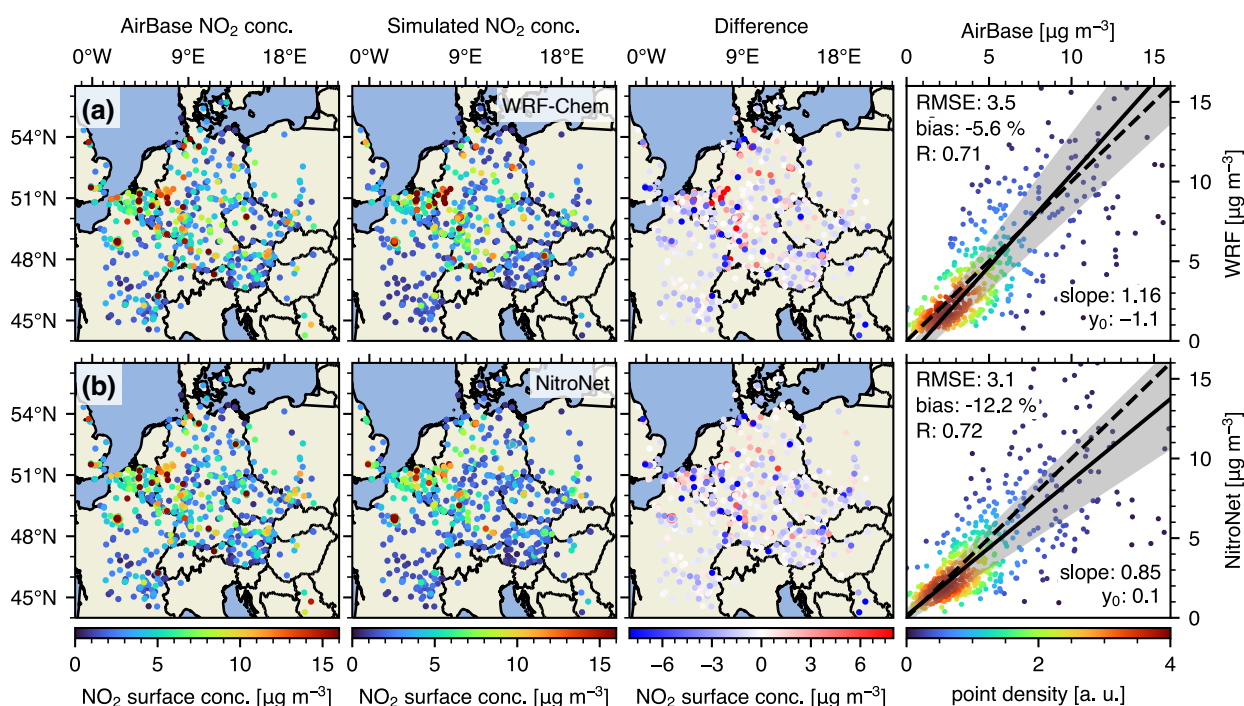

**Figure D1.** Like Fig. 5 of the manuscript (a comparison of WRF-Chem and NitroNet to AirBase observations of surface NO<sub>2</sub> for the year 2019) but with all AirBase instruments removed, that were no longer flagged as „valid“ in the year 2022.

Note that this results in slightly fewer stations than shown in Fig. 7b, because not all stations valid in 2022 were available and/or valid in 2019. However, the stations identified as possibly problematic in the discussions of sect. 4.2.1 (e.g. in northern Italy), are removed as expected. The results show slightly better agreement than Fig. 5. However, the differences are small and do not significantly impact the discussions / results of sect. 4.1 and 4.2.1. Although it might be interesting in the context of our manuscript, the method of classifying stations from 2019 based on criteria from 2022 is also questionable. For example, stations are flagged as „invalid“, if their measured values are lower than their detection limit. This could well be the case in 2022, but not in 2019, if the local pollution levels shrunk accordingly from 2019 to 2022. Therefore, we



argue that the AirBase station classification of 2019 should not be influenced by posterior knowledge from 2022. For these reasons, we gladly provide the figure in the interactive discussion, but prefer not to add it to the manuscript.

13. Figure 8: Please clarify based on which temporal scale (every scatter point or the monthly-mean) these statistics are calculated.

The statistics are calculated based on the monthly-mean scatter points.

The following sentence was added to caption of Figure 8: (...) and were computed based on the monthly-mean scatter points.

14. Figure 9: “within a radius of 5 km were drawn at 0 m altitude” needs a reference.

This is not a reference to literature. The sentence means: „For each MAX-DOAS station, we have checked for AirBase stations within a radius of 5 km. Then, their measured NO<sub>2</sub> concentrations were drawn in the diagrams of Figure 9.“

The following sentence was added to sect. 4.2.2: *Additionally, colocated measurements from in situ measurements (within a radius of 5 km) were drawn in the corresponding subplots of Fig. 9.*

15. Lines 507-509: The transformer model could be also considered (See <https://www.microsoft.com/en-us/research/blog/introducing-aurora-the-first-large-scale-foundation-model-of-the-atmosphere/>).

We thank the Referee for this additional suggestion.

The following sentence was added to sect. 5: *This is motivated by the recent advancements in machine learning based weather prediction (e.g. the Aurora model, based on vision transformers and encoder-decoder mechanisms, see Bodnar et al. (2024)).*

#### Technical corrections:

1. Line 18: “geographic domain” should be modified as “geographic and temporal domain”. Changed as proposed.
2. Please pay attention to writing out acronyms at their first occurrence (e.g., TROPOMI, LIDAR, CAMS, etc). We have perused the manuscript and written out acronyms at their first occurrence after the abstract.
3. Line 28 “10 ug/m<sup>3</sup>”: Reference is needed.

The following reference was added:

World Health Organization: WHO global air quality guidelines: particulate matter (PM<sub>2.5</sub> and PM<sub>10</sub>), ozone, nitrogen dioxide, sulfur dioxide and carbon monoxide. 2021.

4. Line 44 “to be the main cause”: “to be one of the main causes”. Changed as proposed.
5. Line 69 “CAMS”: “CAMS regional”. Changed as proposed.

#### **References:**

Douros, J., Eskes, H., van Geffen, J., Boersma, K. F., Compernelle, S., Pinardi, G., Blechschmidt, A.-M., Peuch, V.-H., Colette, A., and Veefkind, P.: Comparing Sentinel-5P TROPOMI NO<sub>2</sub> column observations with the CAMS regional air quality ensemble, *Geosci. Model Dev.*, 16, 509–534, <https://doi.org/10.5194/gmd-16-509-2023>, 2023.

Kuhn, L., Beirle, S., Kumar, V., Osipov, S., Pozzer, A., Bösch, T., Kumar, R., and Wagner, T.: On the influence of vertical mixing, boundary layer schemes, and temporal emission profiles on tropospheric NO<sub>2</sub> in WRF-Chem – comparisons to in situ, satellite, and MAX-DOAS observations, *Atmos. Chem. Phys.*, 24, 185–217, <https://doi.org/10.5194/acp-24-185-2024>, 2024.

Tirpitz, J.-L., Frieß, U., Hendrick, F., Alberti, C., Allaart, M., Apituley, A., Bais, A., Beirle, S., Berkhout, S., Bognar, K., Bösch, T., Bruchkouski, I., Cede, A., Chan, K. L., den Hoed, M., Donner, S., Drosoglou, T., Fayt, C., Friedrich, M. M., Frumau, A., Gast, L., Gielen, C., Gomez-Martín, L., Hao, N., Hensen, A., Henzing, B., Hermans, C., Jin, J., Kreher, K., Kuhn, J., Lampel, J., Li, A., Liu, C., Liu, H., Ma, J., Merlaud, A., Peters, E., Pinardi, G., Pipers, A., Platt, U., Puentedura, O., Richter, A., Schmitt, S., Spinei, E., Stein Zweers, D., Strong, K., Swart, D., Tack, F., Tiefengraber, M., van der Hoff, R., van Roozendaal, M., Vlemmix, T., Vonk, J., Wagner, T., Wang, Y., Wang, Z., Wenig, M., Wiegner, M., Wittrock, F., Xie, P., Xing, C., Xu, J., Yela, M., Zhang, C., and Zhao, X.: Intercomparison of MAX-DOAS vertical profile retrieval algorithms: studies on field data from the CINDI-2 campaign, *Atmos. Meas. Tech.*, 14, 1–35, <https://doi.org/10.5194/amt-14-1-2021>, 2021.
